# Supplementary material for: Regulating the surface topography of CpG nanoadjuvants via coordination-driven self-assembly for enhanced tumor immunotherapy
Source: Royal Society of Chemistry journal article supplement (doi:10.1039/d3na00322a), 2023-01-01
Supplement: d3na00322a1.pdf [file d3na00322a1.pdf]

## Supporting Information

### Regulating the Surface Topography of CpG Nanoadjuvant via Coordination-Driven Self-assembly for Enhanced Tumor Immunotherapy

Li Zhang, Lingpu Zhang, Yuqi Wang, Kai Jiang, Chao Gao, Pengfei Zhang, Yujie Xie, Bin Wang, Haihua Xiao\*, and Jie Song\*

**Materials.** CpG-B (5'-TCCATGACGTTCTGACGTT-3', 20 nt, 6059.0 g mol<sup>-1</sup>, purification: ULTRAPAGE) and FAM-labeled CpG (FAM-5'-TCCATGACGTTCTGACGTT-3', 20 nt, 6596.6 g mol<sup>-1</sup>, purification: HPLC) were purchased from Sangon Biotech (Shanghai) Co., Ltd. Ferrous chloride tetrahydrate (FeCl<sub>2</sub>·4H<sub>2</sub>O, purity ≥ 99.0%, 198.81 g mol<sup>-1</sup>), magnesium chloride hexahydrate (MgCl<sub>2</sub>·6H<sub>2</sub>O, purity ≥ 99.0%, 203.3 g mol<sup>-1</sup>) were purchased from Sigma-Aldrich (Shanghai) Trading Co., Ltd. Hoechst 33258 (Ex/Em: 352/461 nm), LysoTracker Red DND-99 (Ex/Em: 577/590 nm), CellTracker™ Deep Red (Ex/Em: 630/660 nm) were from Invitrogen. Dulbecco's modified eagle medium (DMEM, [+] 4.5 g L<sup>-1</sup> D-glucose, [+] L-glutamine, [-] sodium pyruvate), fetal bovine serum (FBS), penicillin-streptomycin (P/S, [+] 5000 units mL<sup>-1</sup> penicillin, [+] 5000 units mL<sup>-1</sup> streptomycin), and Trypsin-EDTA solution were purchased from Gibco. 3-(4,5-dimethylthiazol-2-yl)-2,5-diphenyltetrazolium bromide (MTT, >98%), calcein AM and ethidium homodimer-1 (EthD-1) live/dead viability kit and phosphate-buffered saline (PBS, pH 7.2-7.4, 0.01 M) were from Solarbio. Ultrapure water was used throughout this research.

**Instruments.** NanoDrop One microvolume UV-Vis spectrophotometer (Thermo Scientific) was used for the concentration measurement of the DNA solution. G-Storm gradient PCR (Bio-Rad Laboratories, Inc.) was used for the constant temperature heating process. A circular dichroism spectrometer (Applied Photophysics Chirascan V100, Applied Photophysics) was used to characterize the assembly process. Transmission electron microscope (JEM-2100F, JEOL), scanning electron microscope (S-4800, Hitachi), and particle and molecular charge analyzer with a 633 nm He-Ne laser (Zetasizer Nano ZS ZEN3600, Malvern) were used to characterize the morphology, size and zeta potential of the synthesized nanoparticles. Flow cytometry (CytoFLEX LX, Beckman Coulter) with a 488 nm laser was used for the cellular uptake efficiency of FAM-labeled nanoparticles. Topica confocal laser scanning microscope

with 405, 488, 561, and 640 nm solid laser (CSU-W1-SoRa, Nikon) was used for cell fluorescence imaging. Real-time qPCR analysis (Bio-Rad Laboratories, Inc.) was used for the gene profiling.

**Table S1.** Feeding ratios of four structural CpG NPs

| Samples          | $C_{\text{CpG}}$<br>[ $\mu\text{M}$ ] | $C_{\text{Fe}^{2+}}$<br>[mM] | Molar ratio<br>(CpG: $\text{Fe}^{2+}$ ) | Solvent                               |
|------------------|---------------------------------------|------------------------------|-----------------------------------------|---------------------------------------|
| NP <sup>sp</sup> | 10                                    | 4                            | 1: 400                                  | ddH <sub>2</sub> O                    |
| NP <sup>ur</sup> | 10                                    | 2                            | 1:200                                   | ddH <sub>2</sub> O + Mg <sup>2+</sup> |
| NP <sup>po</sup> | 10                                    | 8                            | 1: 800                                  | Tris buffer + Mg <sup>2+</sup>        |
| NP <sup>bu</sup> | 80                                    | 80                           | 1: 1000                                 | Tris buffer + Mg <sup>2+</sup>        |

**Table S2.** Hydrodynamic sizes of CpG NPs determined by DLS

| Samples          | In ddH <sub>2</sub> O      |                | In PBS                     |                |
|------------------|----------------------------|----------------|----------------------------|----------------|
|                  | Effective diameter<br>[nm] | Polydispersity | Effective diameter<br>[nm] | Polydispersity |
| NP <sup>sp</sup> | 173.7                      | 0.20           | 158.7                      | 0.21           |
| NP <sup>ur</sup> | 132.1                      | 0.39           | 121.7                      | 0.47           |
| NP <sup>po</sup> | 168.0                      | 0.55           | 138.0                      | 0.07           |
| NP <sup>bu</sup> | 216.4                      | 0.26           | 177.7                      | 0.35           |

**Table S3.** Forward and reverse primers used for gene profiling

| Gene          | Primer  |                              |
|---------------|---------|------------------------------|
| ATCB          | Forward | 5'-GGCTGTATTCCCCTCCATCG-3'   |
|               | Reverse | 5'-CCAGTTGGTAACAATGCCATGT-3' |
| TNF- $\alpha$ | Forward | 5'-TGGAAGTGGCAGAAGAG-3'      |
|               | Reverse | 5'-CCATAGAAGTATGATGAGAGG-3'  |
| IL-12b        | Forward | 5'-TGTGGAATGGCGTCTCTGTC-3'   |
|               | Reverse | 5'-AGTTCAATGGGCAGGGTCTC-3'   |
| Arg-1         | Forward | 5'-GTGGGAATGGAGGACATGGG-3'   |
|               | Reverse | 5'-GGATTAGCACCTGGTCCCG-3'    |
| Mrc-1         | Forward | 5'-GTGGAGTGATGGAACCCAG-3'    |
|               | Reverse | 5'-CTGTCCGCCAGTATCCATC-3'    |

**Table S4.** Inhibition percentage of M2 markers after incubation with PBS, free CpG, free FeCl<sub>2</sub> and four types of CpG NPs for 20 hours.

| Samples                | Gene expression after incubation with IL-4 for first 20 h |        | Gene expression after incubation with samples for second 20 h |         | Inhibition percentage of M2 markers |       |
|------------------------|-----------------------------------------------------------|--------|---------------------------------------------------------------|---------|-------------------------------------|-------|
|                        | Arg-1                                                     | Mrc-1  | Arg-1                                                         | Mrc-1   | Arg-1                               | Mrc-1 |
| Free CpG               |                                                           |        | 0.37094                                                       | 0.03242 | 98.4%                               | 99.6% |
| Free FeCl <sub>2</sub> |                                                           |        | 0.22633                                                       | 0.10899 | 99.0%                               | 98.8% |
| NP <sup>sp</sup>       | 23.81494                                                  | 9.1942 | 0.09354                                                       | 0.03242 | 99.6%                               | 99.6% |
| NP <sup>ur</sup>       |                                                           |        | 1.01596                                                       | 0.044   | 95.7%                               | 99.5% |
| NP <sup>po</sup>       |                                                           |        | 0.07622                                                       | 0.02742 | 99.7%                               | 99.7% |
| NP <sup>bu</sup>       |                                                           |        | 0.15313                                                       | 0.04429 | 99.4%                               | 99.5% |

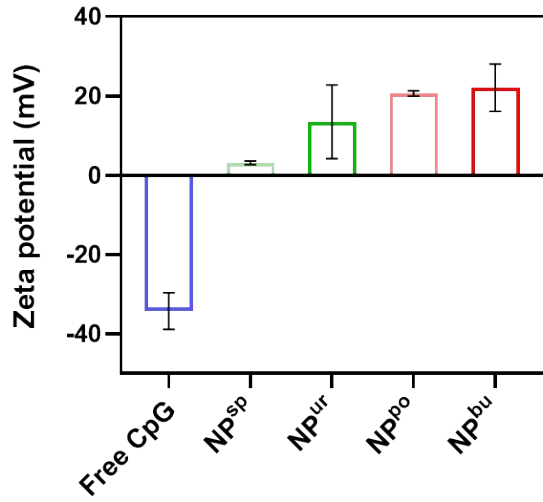

**Figure S1.** Zeta potentials of free CpG ODNs and CpG NPs.

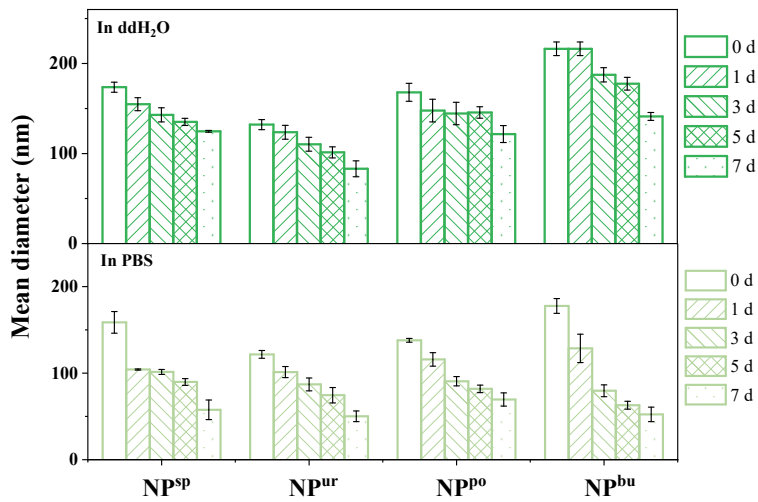

**Figure S2.** Structural stability of the four CpG NPs in ddH<sub>2</sub>O and PBS buffer (pH 7.4) determined by DLS results.

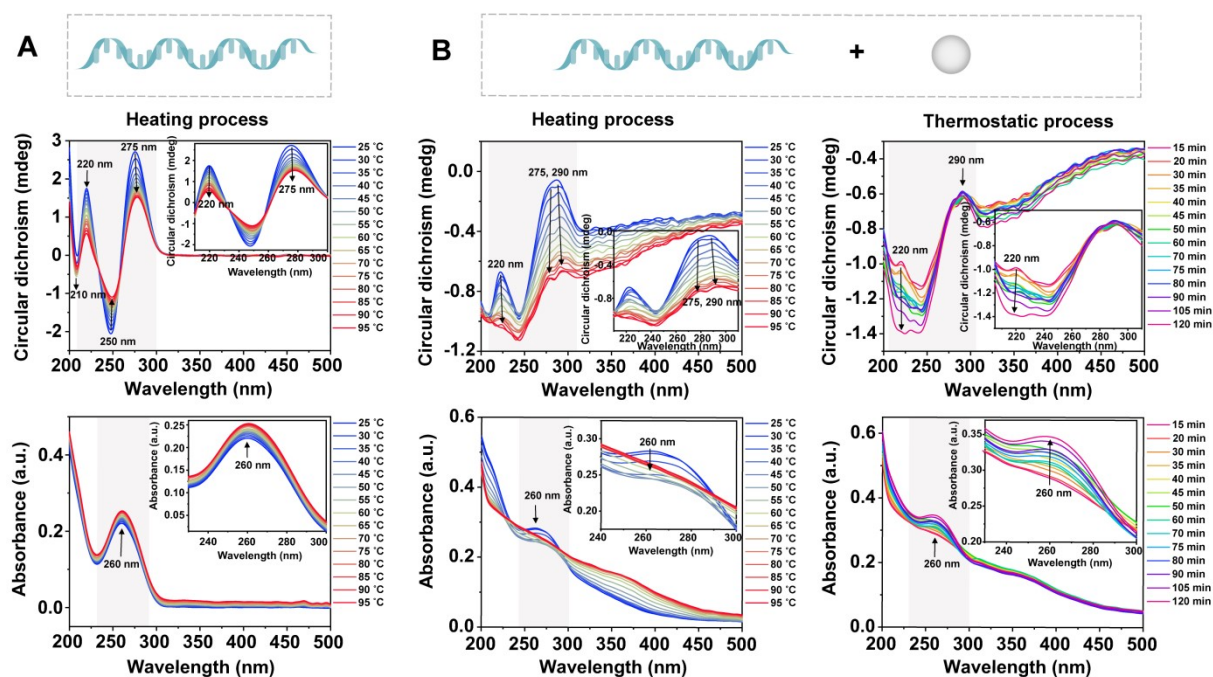

**Figure S3.** (A) Circular dichroism spectra (top) and ultraviolet-visible spectra (bottom) of free CpG ODNs in a heating process of 25~95 °C. Insert: amplification of the region corresponding to the characteristic absorption peaks. (B) Circular dichroism spectra (top) and ultraviolet-visible spectra (bottom) of the assembly solution in a heating process of 25~95 °C (left) and in a thermostatic process of 95 °C (right). Insert: amplification of the region corresponding to the characteristic absorption peaks.

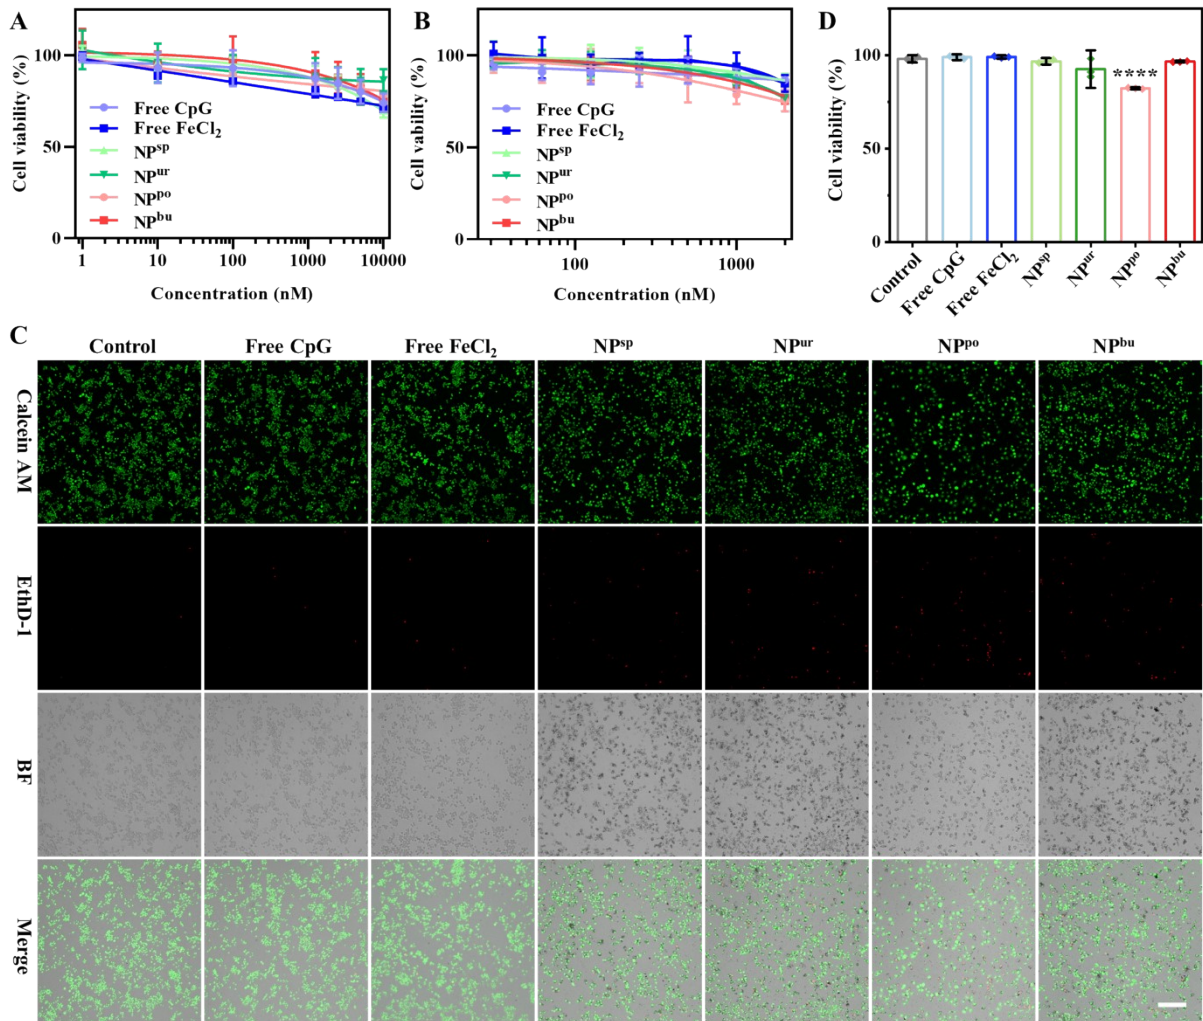

**Figure S4.** *In vitro* cytotoxicity study of four structural CpG NPs. (A) Macrophage viability after incubation with free CpG, FeCl<sub>2</sub>, and CpG NPs at a series of CpG concentration gradients (0~10000 nM) for 24 h. (B) Hacat viability after incubation with free CpG, FeCl<sub>2</sub>, and CpG NPs at a series of CpG concentration gradients (0~2000 nM) for 24 h. Data were shown as mean  $\pm$  SD (n=6). (C) Fluorescence images of RAW264.7 cells after incubation with free CpG and CpG NPs at CpG equivalent 1000 nM, and 400  $\mu$ M free FeCl<sub>2</sub> for 24 h. The assay stained live cells with calcein-AM (green), and dead cells with ethidium homodimer-1 (red). Scale bars, 200  $\mu$ m. (D) Macrophage viability calculated from the live/dead cell-stained fluorescent images.

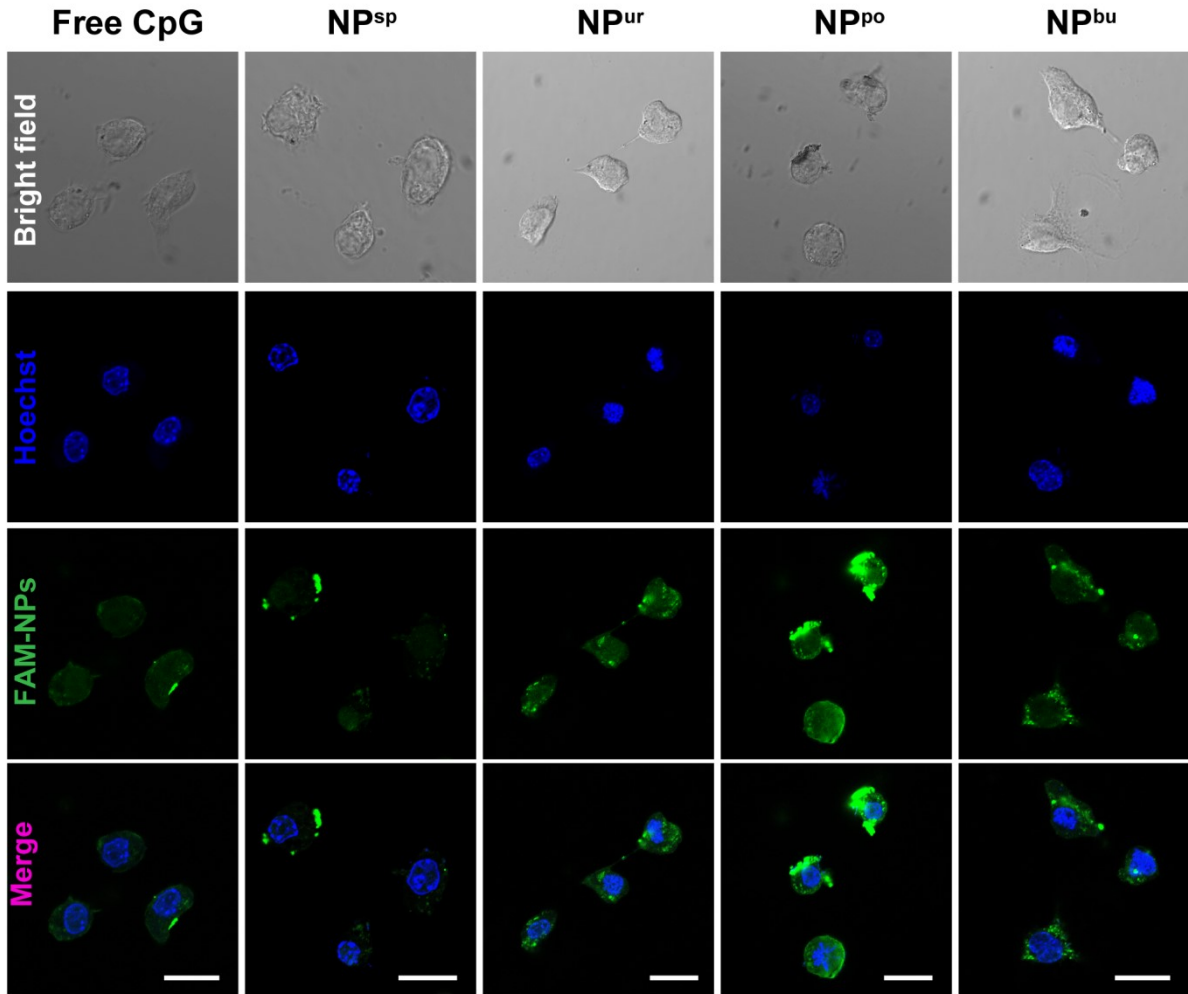

**Figure S5.** Confocal microscopy images of RAW264.7 cells incubated with free CpG and four CpG NPs for 4 h. Scale bar: 20  $\mu\text{m}$ .

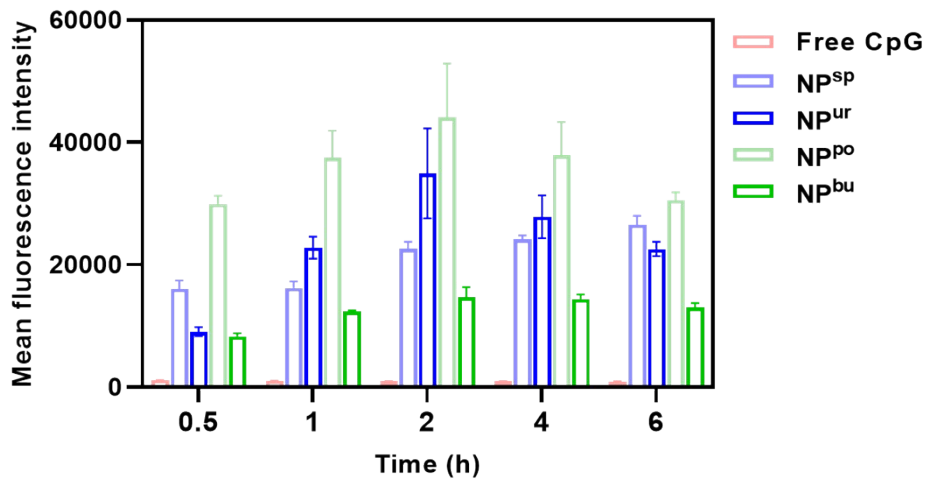

**Figure S6.** Flow cytometry analysis of the cellular uptake efficiency of free CpG and CpG NPs after different times (0.5, 1, 2, 4, and 6 h) of incubation.



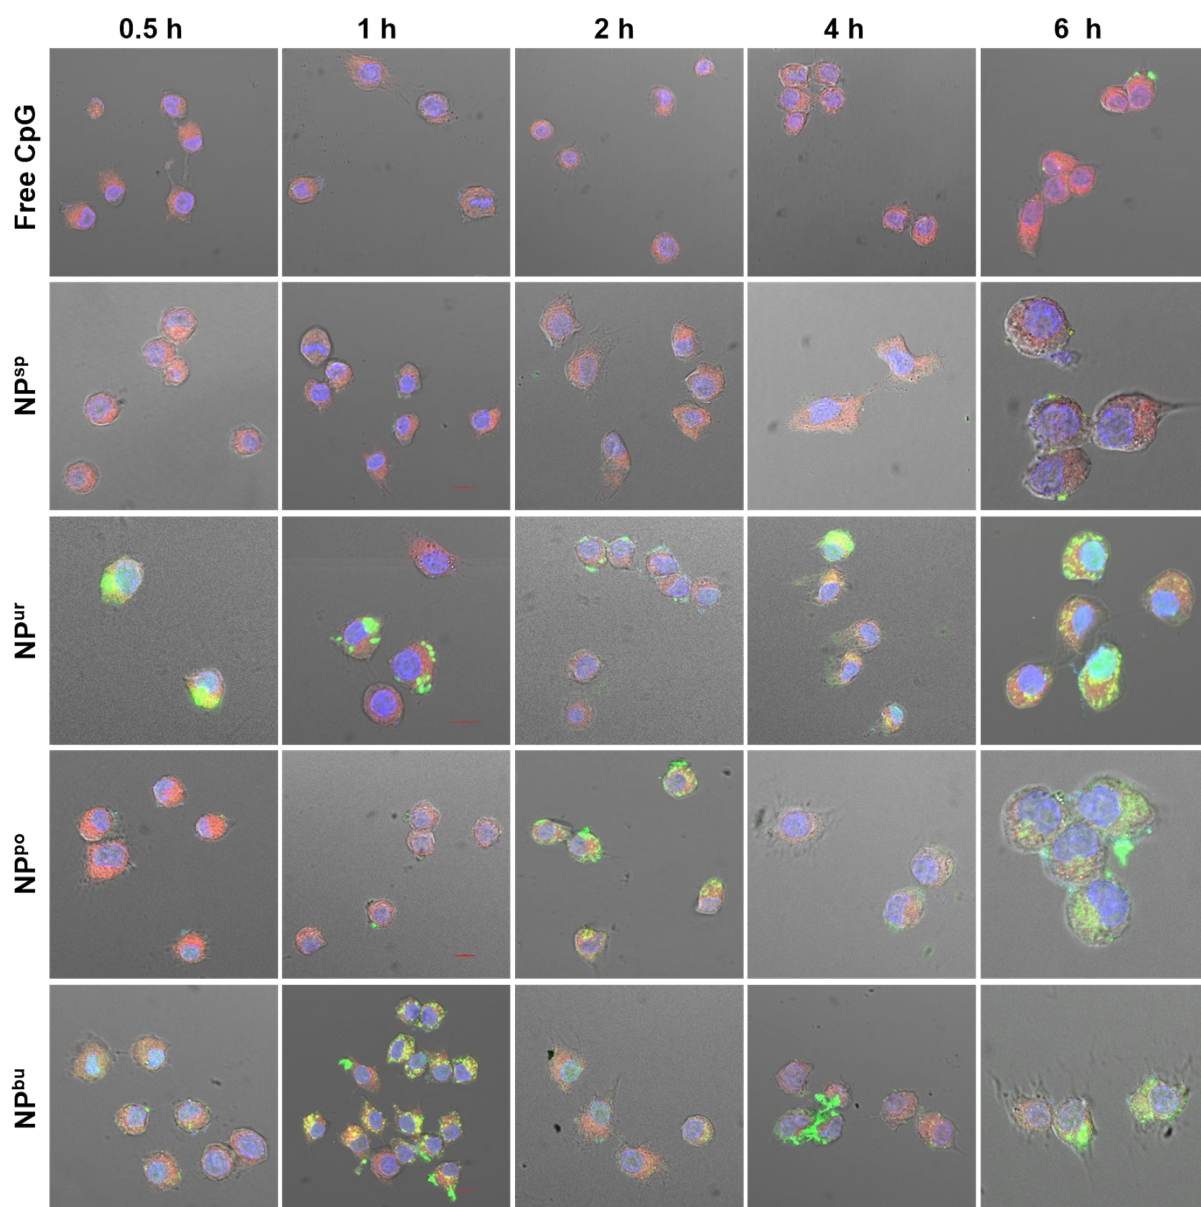

**Figure S7.** Representative fluorescence images collected from each sample group at each time point for co-location parameter analysis.



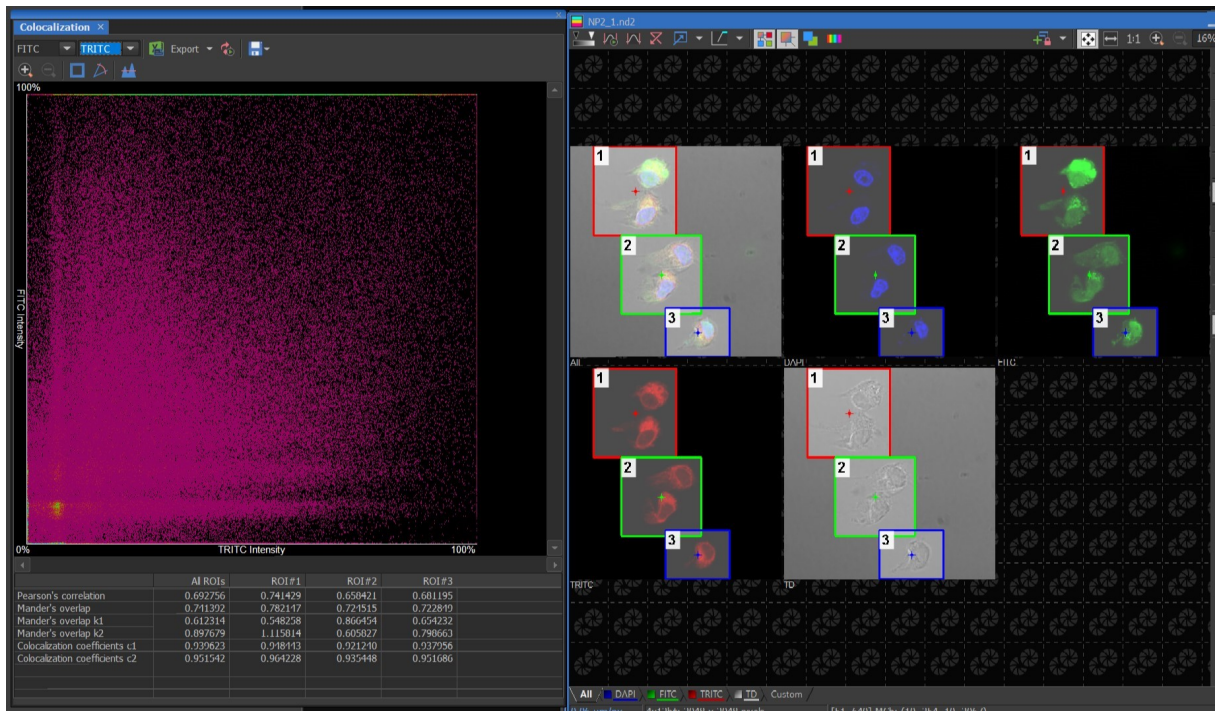

**Figure S8.** Co-localization parameters (Spearman's correlation and Manders' overlap) between green fluorescent pixels (FAM-labeled CpG) and red fluorescent pixels (LysoTracker) were analyzed by the NIS-Elements Analysis software. The figure above displays the image processing of the representative image captured from the cells treated with NP<sup>ur</sup> for 4 h.

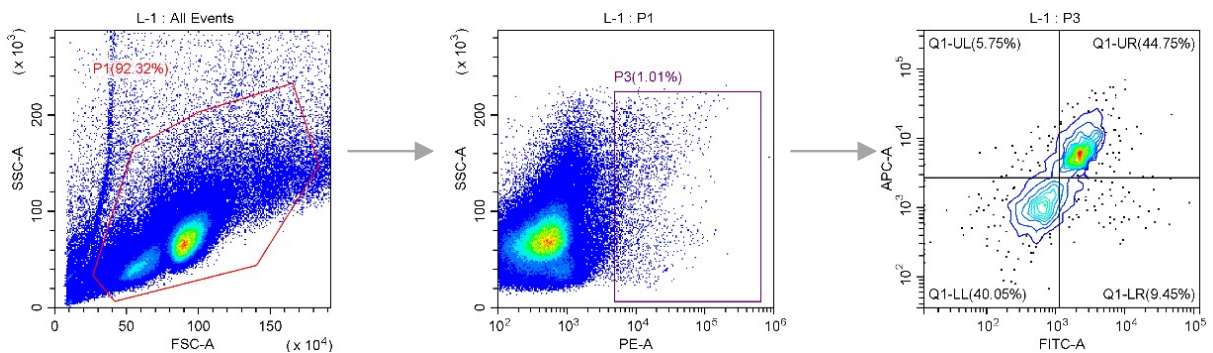

**Figure S9.** The gating strategy for DC maturation (Figure 4B). B16-OVA mice received intramuscular injections of OVA with different structural CpG NPs. The draining lymph nodes were collected 36 hours later for flow cytometry. Single cells were gated on FSC-A, PE-A and FITC-A.

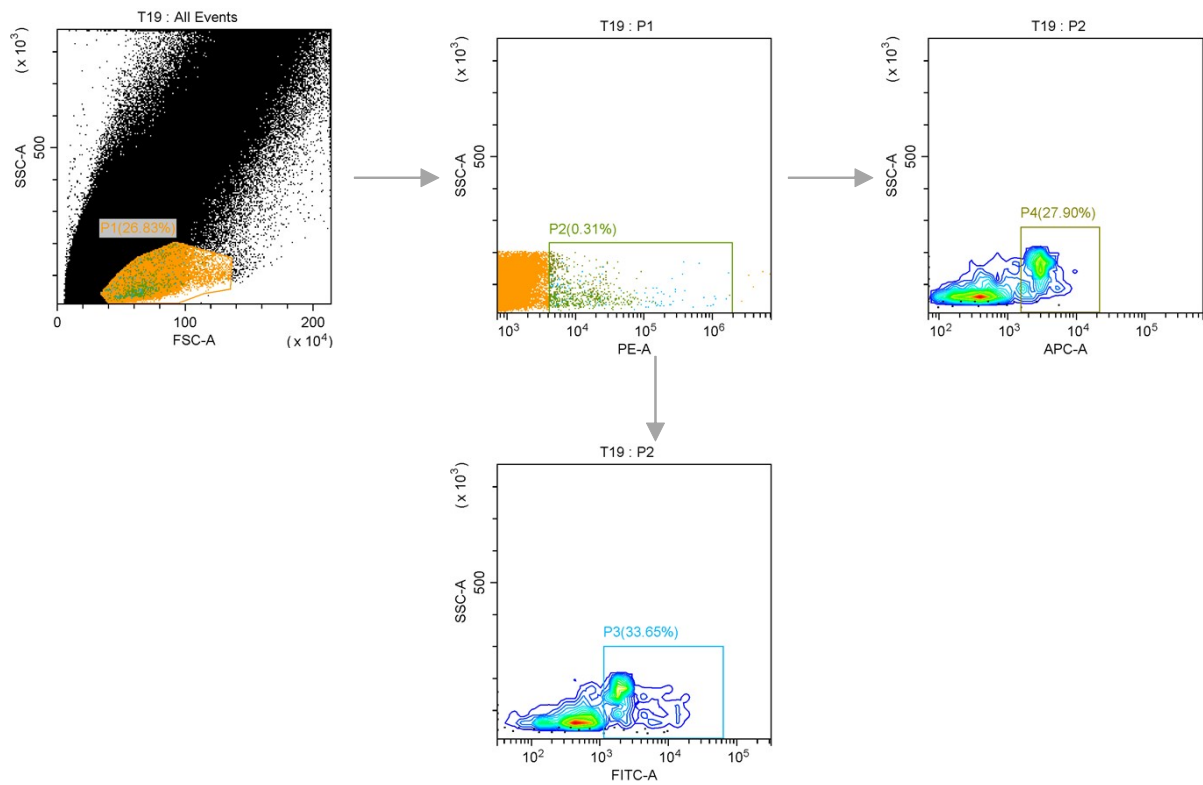

**Figure S10.** The gating strategy for NK cell response (Figure 4C, D). Single cells were firstly gated in the basis of FSC-A and PE-A, then gated on APC-A and FITC-A.

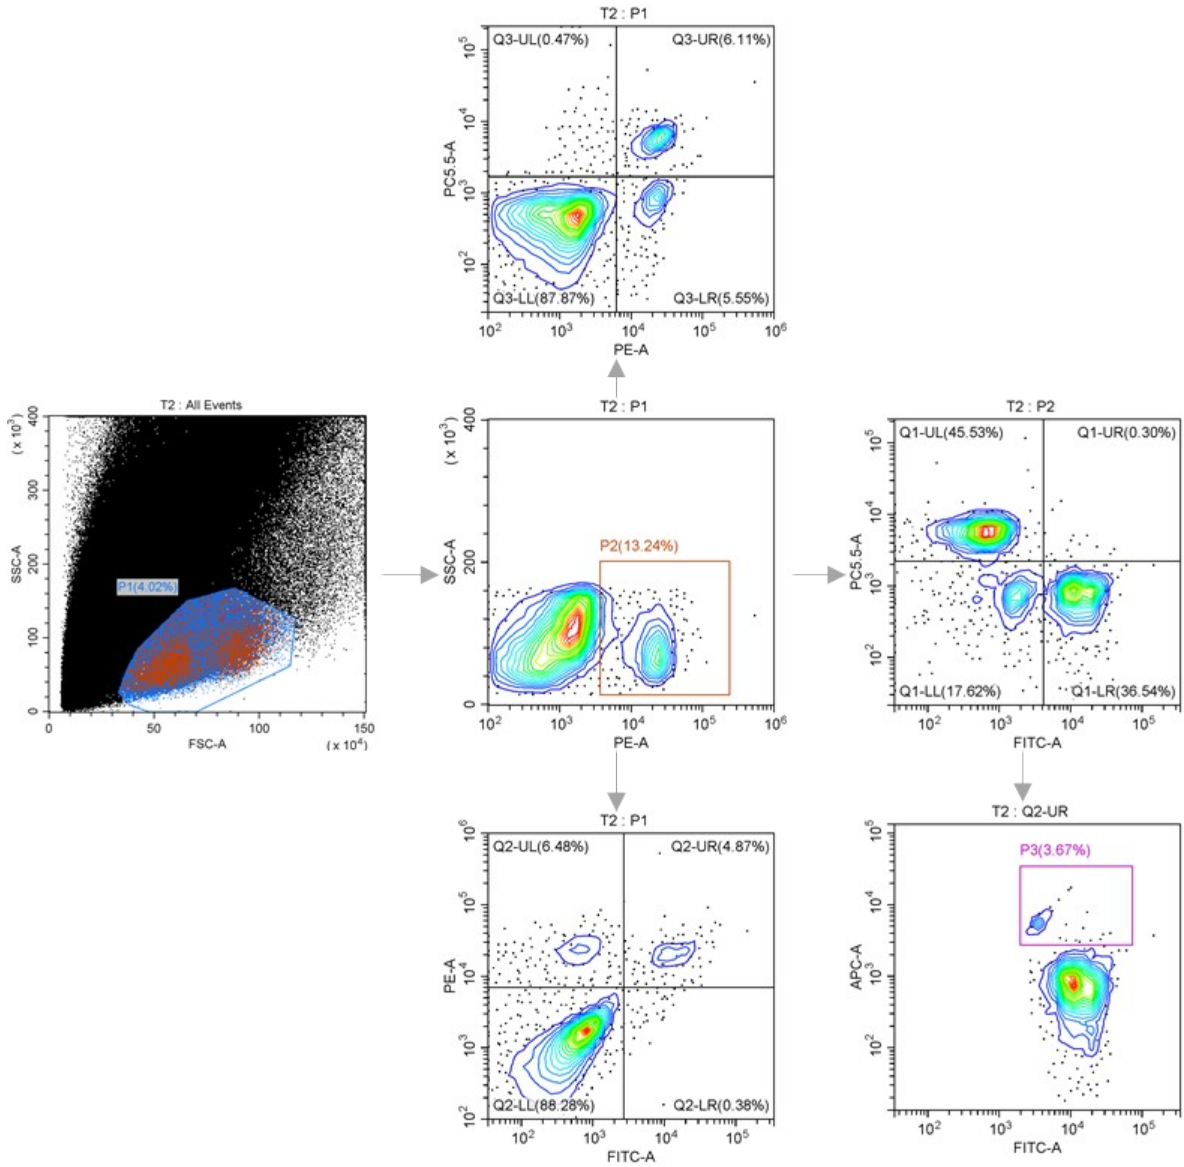

**Figure S11.** Gating strategies for T cell responses (Figure 4E). Single cells were firstly gated in the basis of FSC-A, then gated on PE-A, follow with FITC-A.

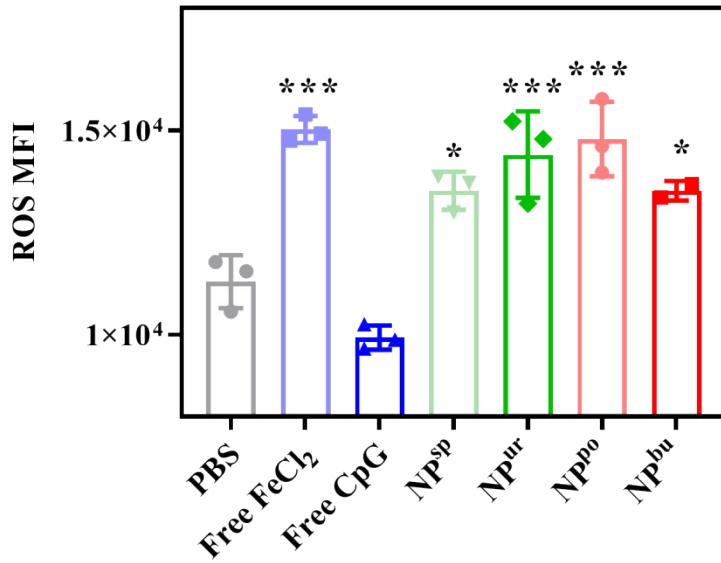

**Figure S12.** ROS levels in Hacat after incubation with free CpG and CpG NPs at CpG equivalent 1000 nM, and 400  $\mu$ M free FeCl<sub>2</sub> for 24 h.

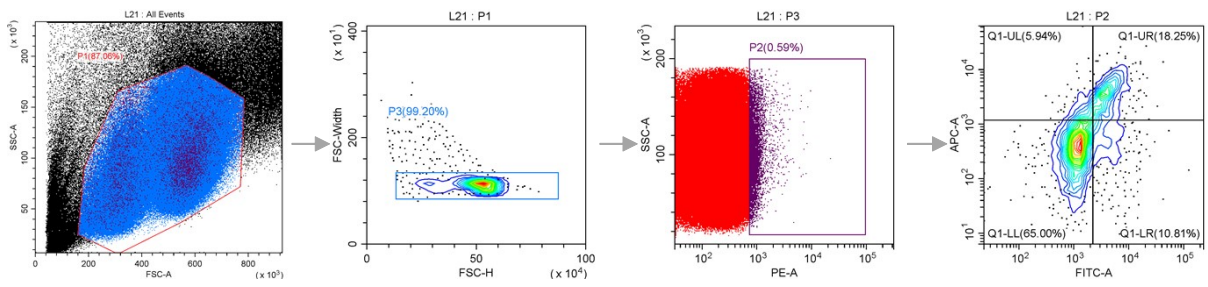

**Figure S13.** The gating strategy for DC mature (Figure 5F). Single cells were gated on FSC-A, FSC-H, PE-A and FITC-A.

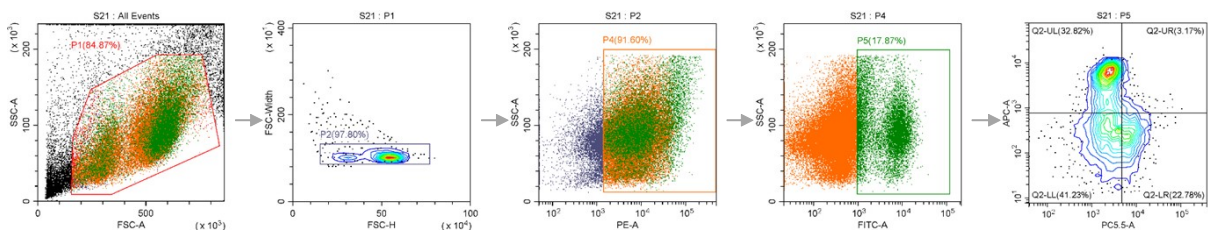

**Figure S14.** Gating strategies for T cell responses (Figure 5F). Single cells were firstly gated in the basis of FSC-A, FSC-H, PE-A, FITC-A and PC5.5-A.

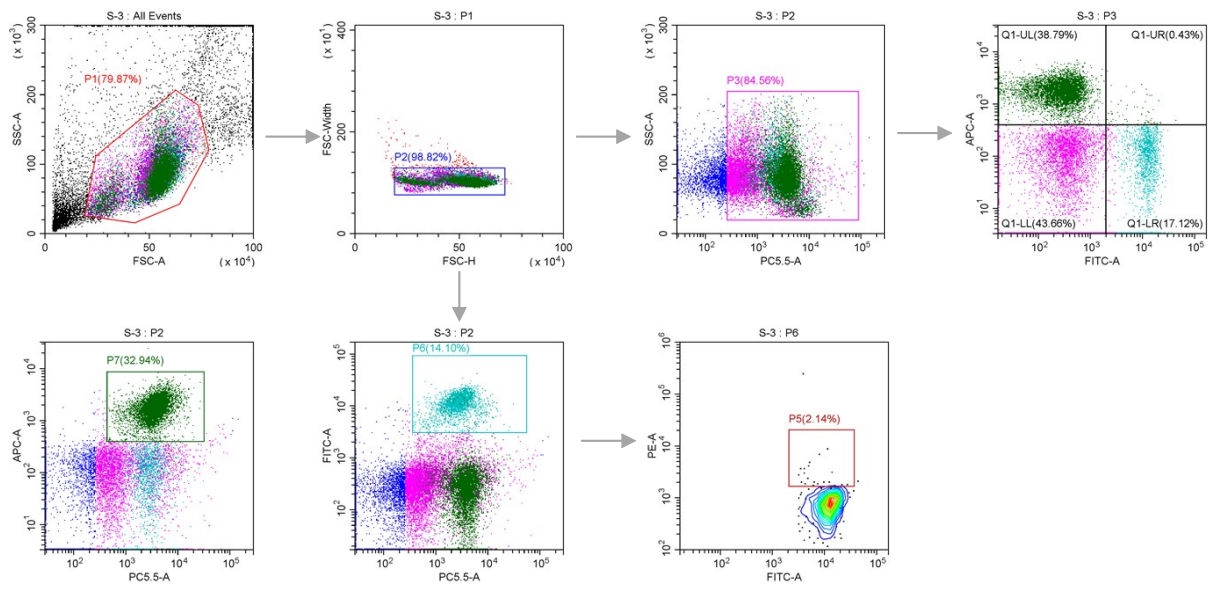

**Figure S15.** Single cells were gated on FSC-A, FSC-H, PE-A, FITC-A and PC5.5-A for the analysis of expressions of CD4, CD8, and IFN- $\gamma$  (Figure 5F).
